# Supplementary material for: Influence of the North Atlantic subpolar gyre circulation on the 4.2 ka BP event
Source: Copernicus journal article supplement (doi:10.5194/cp-15-701-2019), 2019-04-08
Supplement: Supplementary file 1 [file cp-15-701-2019-supplement.pdf]

Supplement of *Clim. Past*, 15, 701–711, 2019  
<https://doi.org/10.5194/cp-15-701-2019-supplement>  
© Author(s) 2019. This work is distributed under  
the Creative Commons Attribution 4.0 License.

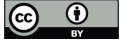

*Supplement of*

## **Influence of the North Atlantic subpolar gyre circulation on the 4.2 ka BP event**

**Bassem Jalali et al.**

*Correspondence to:* Bassem Jalali ([bassemfss@gmail.com](mailto:bassemfss@gmail.com))

The copyright of individual parts of the supplement might differ from the CC BY 4.0 License.

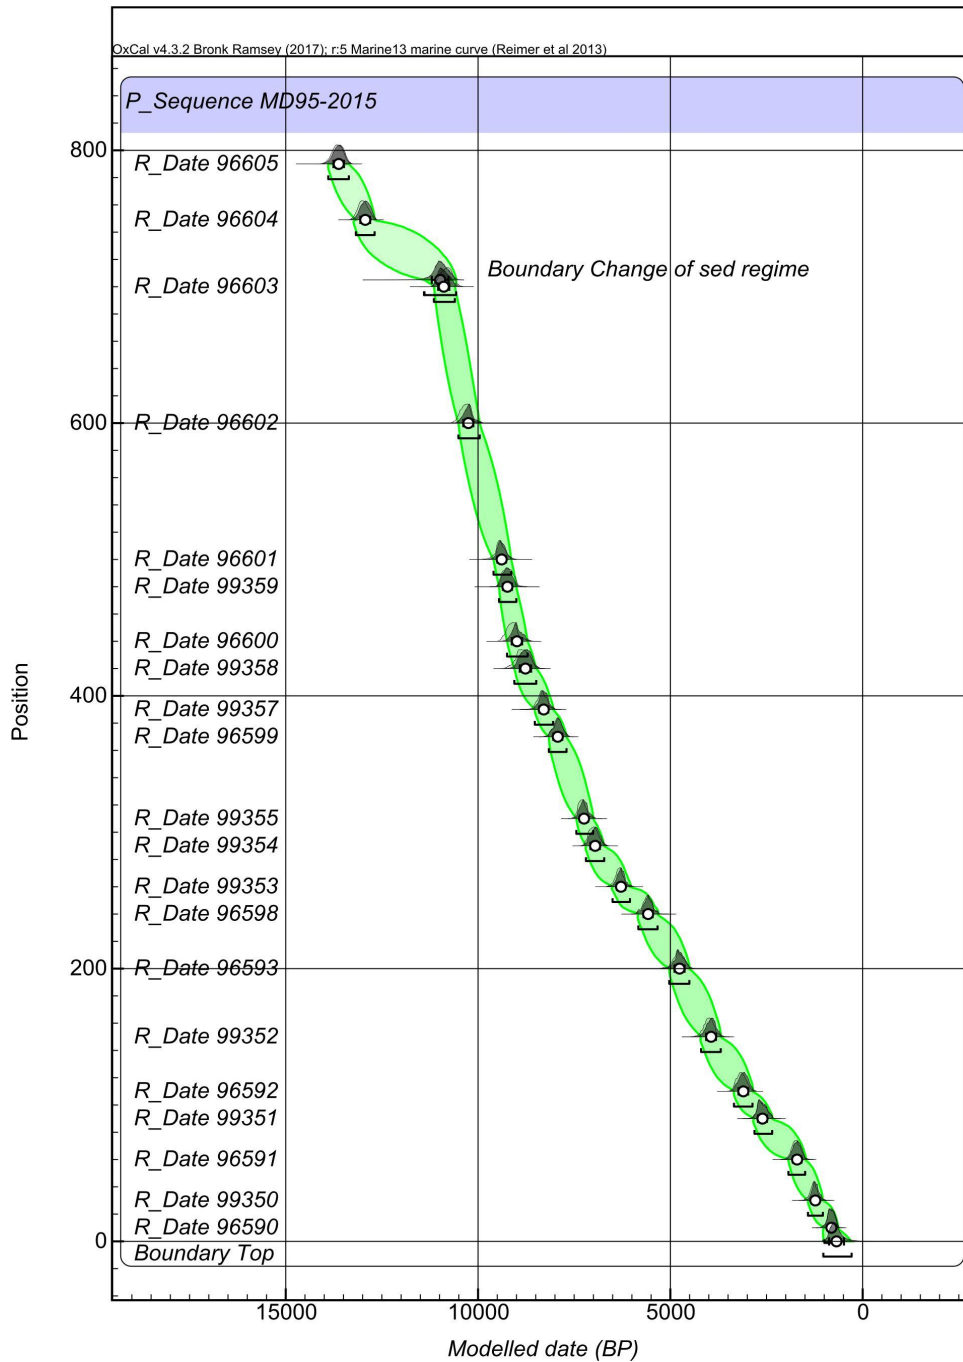

**Figure S1:** Age model of the core MD95-2015 calculated using the Bayesian Oxcal4.3 software (Ramsey, 2017), the MARINE13 calibration data set (Reimer et al., 2013) and a  $\Delta R = 73 \pm 69$  calculated as the mean value of the eight nearest site reservoir ages obtained from the Global Marine Reservoir Database (<http://calib.org/marine/>). The green lines represent  $1\sigma$  age uncertainty.

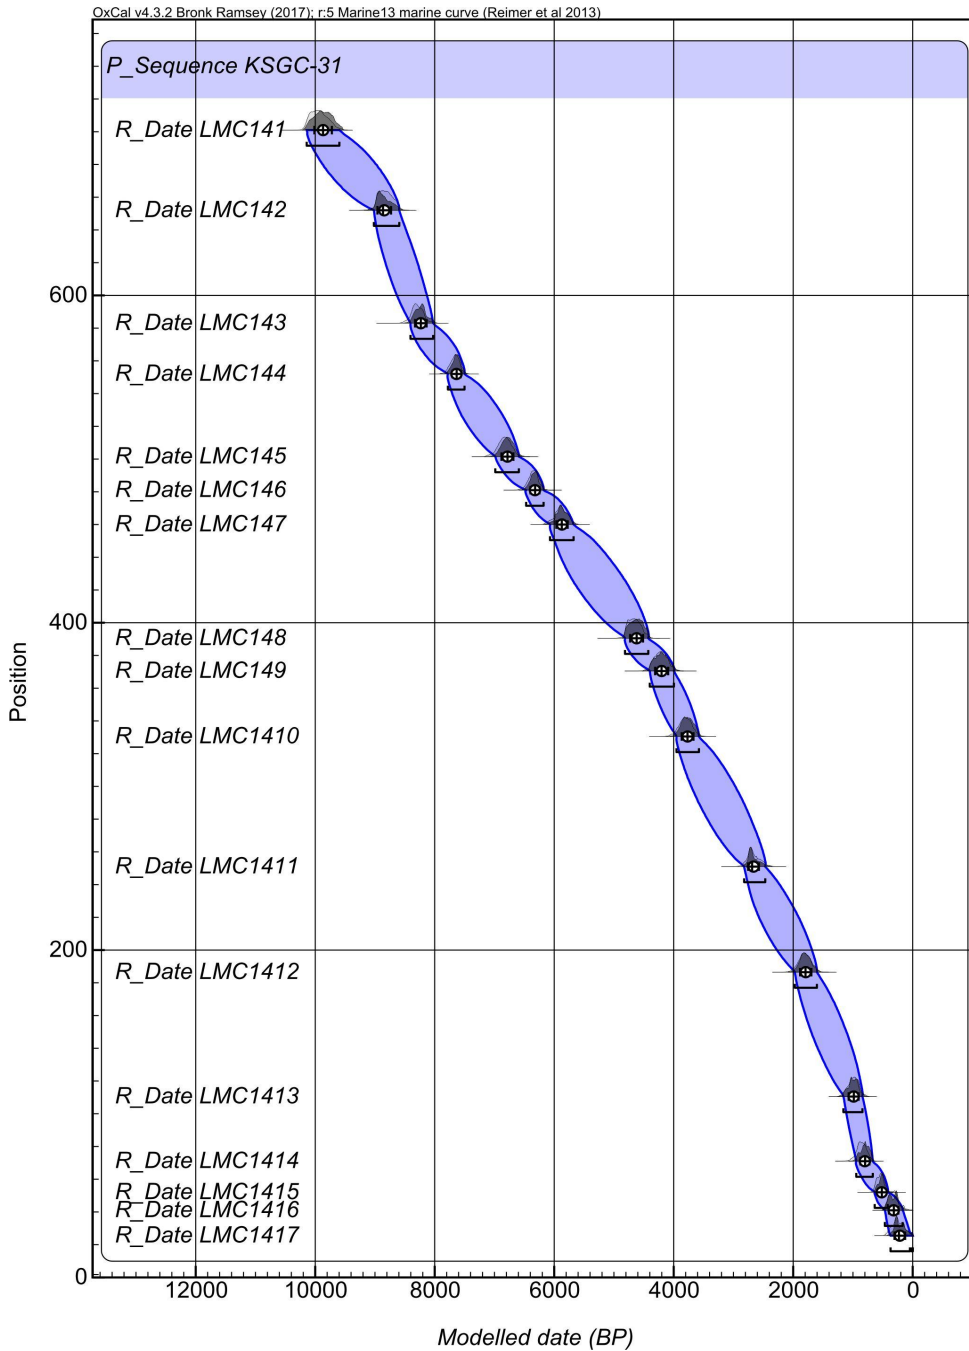

**Figure S2:** Age model of the core KSGC-31 calculated using the Bayesian Oxcal4.3 software (Ramsey, 2017), the MARINE13 calibration data set (Reimer et al., 2013) and a  $\Delta R = 23 \pm 71$  calculated as the mean value of the eight nearest reservoir ages obtained from the Global Marine Reservoir Database (<http://calib.org/marine/>). The blue lines represent  $1\sigma$  age uncertainty.

Table S1: Age models of the MD95-2015 and KSGC-31 sediment cores. Radiocarbon ages have been calibrated using the Bayesian approach of OxCal4.3 software (Ramsey, 2017), the MARINE13 calibration data set (Reimer et al., 2013) and a  $R = 73 \pm 69$  for MD95-2015 and  $23 \pm 71$  for KSGC31 obtained from the Global Marine Reservoir Database using the eight nearest reservoir ages (<http://calib.org/marine/>).

| Core      | Depth (cm) | Lab. No.    | Material                     | $^{14}\text{C}$ Ages (BP)<br>$\pm 1$ Sigma | Modelled Age<br>(Cal BP) $\pm 1$<br>Sigma |
|-----------|------------|-------------|------------------------------|--------------------------------------------|-------------------------------------------|
| MD95-2015 | 0.5        |             | Core Top                     |                                            | 680 $\pm$ 194                             |
| MD95-2015 | 10         | LMC14-96590 | <i>Globigerina bulloides</i> | 1350 $\pm$ 60                              | 813 $\pm$ 92                              |
| MD95-2015 | 30         | LMC14-99350 | <i>Globigerina bulloides</i> | 1790 $\pm$ 60                              | 1231 $\pm$ 94                             |
| MD95-2015 | 60         | LMC14-96591 | <i>Globigerina bulloides</i> | 2220 $\pm$ 60                              | 1704 $\pm$ 110                            |
| MD95-2015 | 90         | LMC14-99351 | <i>Globigerina bulloides</i> | 2960 $\pm$ 60                              | 2605 $\pm$ 118                            |
| MD95-2015 | 110        | LMC14-96592 | <i>Globigerina bulloides</i> | 3390 $\pm$ 60                              | 3103 $\pm$ 124                            |
| MD95-2015 | 150        | LMC14-99352 | <i>Globigerina bulloides</i> | 4060 $\pm$ 60                              | 3941 $\pm$ 128                            |
| MD95-2015 | 200        | LMC14-96593 | <i>Globigerina bulloides</i> | 4660 $\pm$ 70                              | 4762 $\pm$ 131                            |
| MD95-2015 | 240        | LMC14-96598 | <i>Globigerina bulloides</i> | 5310 $\pm$ 80                              | 5579 $\pm$ 119                            |
| MD95-2015 | 260        | LMC14-99353 | <i>Globigerina bulloides</i> | 5980 $\pm$ 70                              | 6283 $\pm$ 107                            |
| MD95-2015 | 290        | LMC14-99354 | <i>Globigerina bulloides</i> | 6570 $\pm$ 70                              | 6955 $\pm$ 122                            |
| MD95-2015 | 310        | LMC14-99355 | <i>Globigerina bulloides</i> | 6850 $\pm$ 80                              | 7244 $\pm$ 108                            |
| MD95-2015 | 390        | LMC14-96599 | <i>Globigerina bulloides</i> | 7540 $\pm$ 90                              | 7927 $\pm$ 116                            |
| MD95-2015 | 390        | LMC14-99357 | <i>Globigerina bulloides</i> | 7950 $\pm$ 90                              | 8292 $\pm$ 116                            |
| MD95-2015 | 420        | LMC14-99358 | <i>Globigerina bulloides</i> | 8370 $\pm$ 100                             | 8768 $\pm$ 134                            |
| MD95-2015 | 440        | LMC14-96600 | <i>Globigerina bulloides</i> | 8560 $\pm$ 80                              | 8989 $\pm$ 134                            |
| MD95-2015 | 480        | LMC14-99359 | <i>Globigerina bulloides</i> | 8660 $\pm$ 90                              | 9236 $\pm$ 117                            |
| MD95-2015 | 500        | LMC14-96601 | <i>Globigerina bulloides</i> | 8840 $\pm$ 90                              | 9385 $\pm$ 112                            |
| MD95-2015 | 600        | LMC14-96602 | <i>Globigerina bulloides</i> | 9540 $\pm$ 90                              | 10252 $\pm$ 130                           |
| MD95-2015 | 700        | LMC14-96603 | <i>Globigerina bulloides</i> | 9940 $\pm$ 90                              | 10891 $\pm$ 144                           |
| MD95-2015 | 749        | LMC14-96604 | <i>Globigerina bulloides</i> | 11590 $\pm$ 90                             | 12932 $\pm$ 127                           |
| MD95-2015 | 790        | LMC14-96605 | <i>Globigerina bulloides</i> | 12270 $\pm$ 100                            | 13622 $\pm$ 137                           |
| KSGC-31   | 0.5        |             | Core Top                     |                                            | -21                                       |

|         |       |       |                                |           |            |
|---------|-------|-------|--------------------------------|-----------|------------|
| KSGC-31 | 25.5  | LMC14 | <i>Venus</i> sp.               | 640 ± 30  | 224 ± 90   |
| KSGC-31 | 41    | LMC14 | <i>Pecten</i> sp.              | 700 ± 30  | 325 ± 80   |
| KSGC-31 | 52    | LMC14 | Indet. bivalve                 | 960 ± 30  | 523 ± 58   |
| KSGC-31 | 71    | LMC14 | <i>Arca tetragona</i>          | 1340 ± 30 | 807 ± 78   |
| KSGC-31 | 110.5 | LMC14 | <i>Venus</i> sp.               | 1465 ± 30 | 995 ± 86   |
| KSGC-31 | 186.5 | LMC14 | <i>Nucula</i> sp.              | 2235 ± 40 | 1797 ± 97  |
| KSGC-31 | 251   | LMC14 | Juvenile bivalve shells (ind.) | 2940 ± 30 | 2670 ± 92  |
| KSGC-31 | 330.5 | LMC14 | <i>Venus casina</i>            | 3870 ± 30 | 3775 ± 103 |
| KSGC-31 | 370.5 | LMC14 | <i>Nuculana</i> sp.            | 4170 ± 30 | 4210 ± 112 |
| KSGC-31 | 390.5 | LMC14 | <i>Turritella</i> sp.          | 4500 ± 30 | 4629 ± 111 |
| KSGC-31 | 460   | LMC14 | <i>Venus</i> sp.               | 5530 ± 45 | 5876 ± 98  |
| KSGC-31 | 481   | LMC14 | <i>Ostrea</i> sp.              | 5955 ± 35 | 6328 ± 79  |
| KSGC-31 | 501.5 | LMC14 | <i>Turritella</i> sp.          | 6380 ± 50 | 6790 ± 103 |
| KSGC-31 | 552   | LMC14 | Shells (mixed)                 | 7215 ± 30 | 7641 ± 73  |
| KSGC-31 | 583   | LMC14 | <i>Turritella</i> sp.          | 7860 ± 60 | 8239 ± 99  |
| KSGC-31 | 652   | LMC14 | <i>Turritella</i> sp.          | 8310 ± 35 | 8852 ± 117 |
| KSGC-31 | 701   | LMC14 | <i>Turritella</i> sp.          | 9190 ± 50 | 9867 ± 148 |

---
